# Supplementary material
Source: MDPI journal article supplement (https://www.mdpi.com/2071-1050/15/2/1429)
Supplement: s1 [file s1]

## Supplementary Material

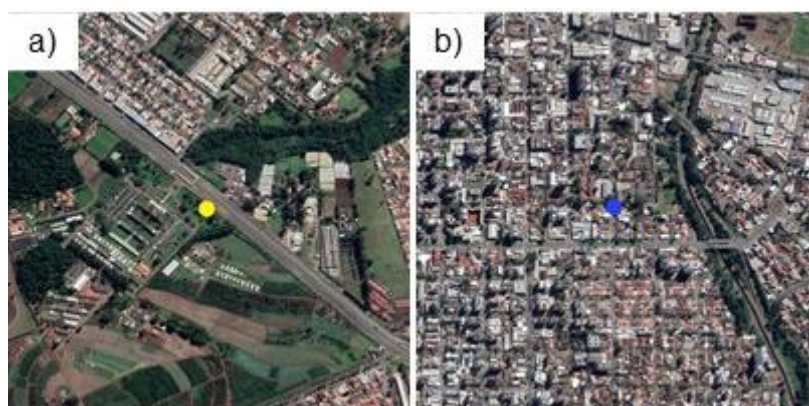

**Figure S1.** a) SIMEPAR and b) IAT monitoring station.

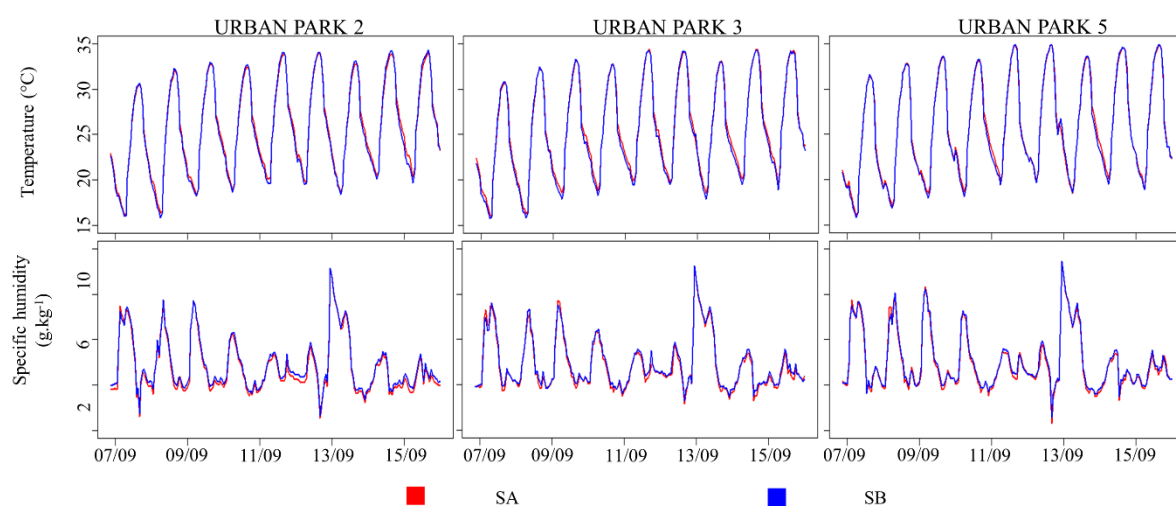

**Figure S2.** Temporal evaluation of temperature and specific humidity simulated at urban parks 2, 3 and 5.

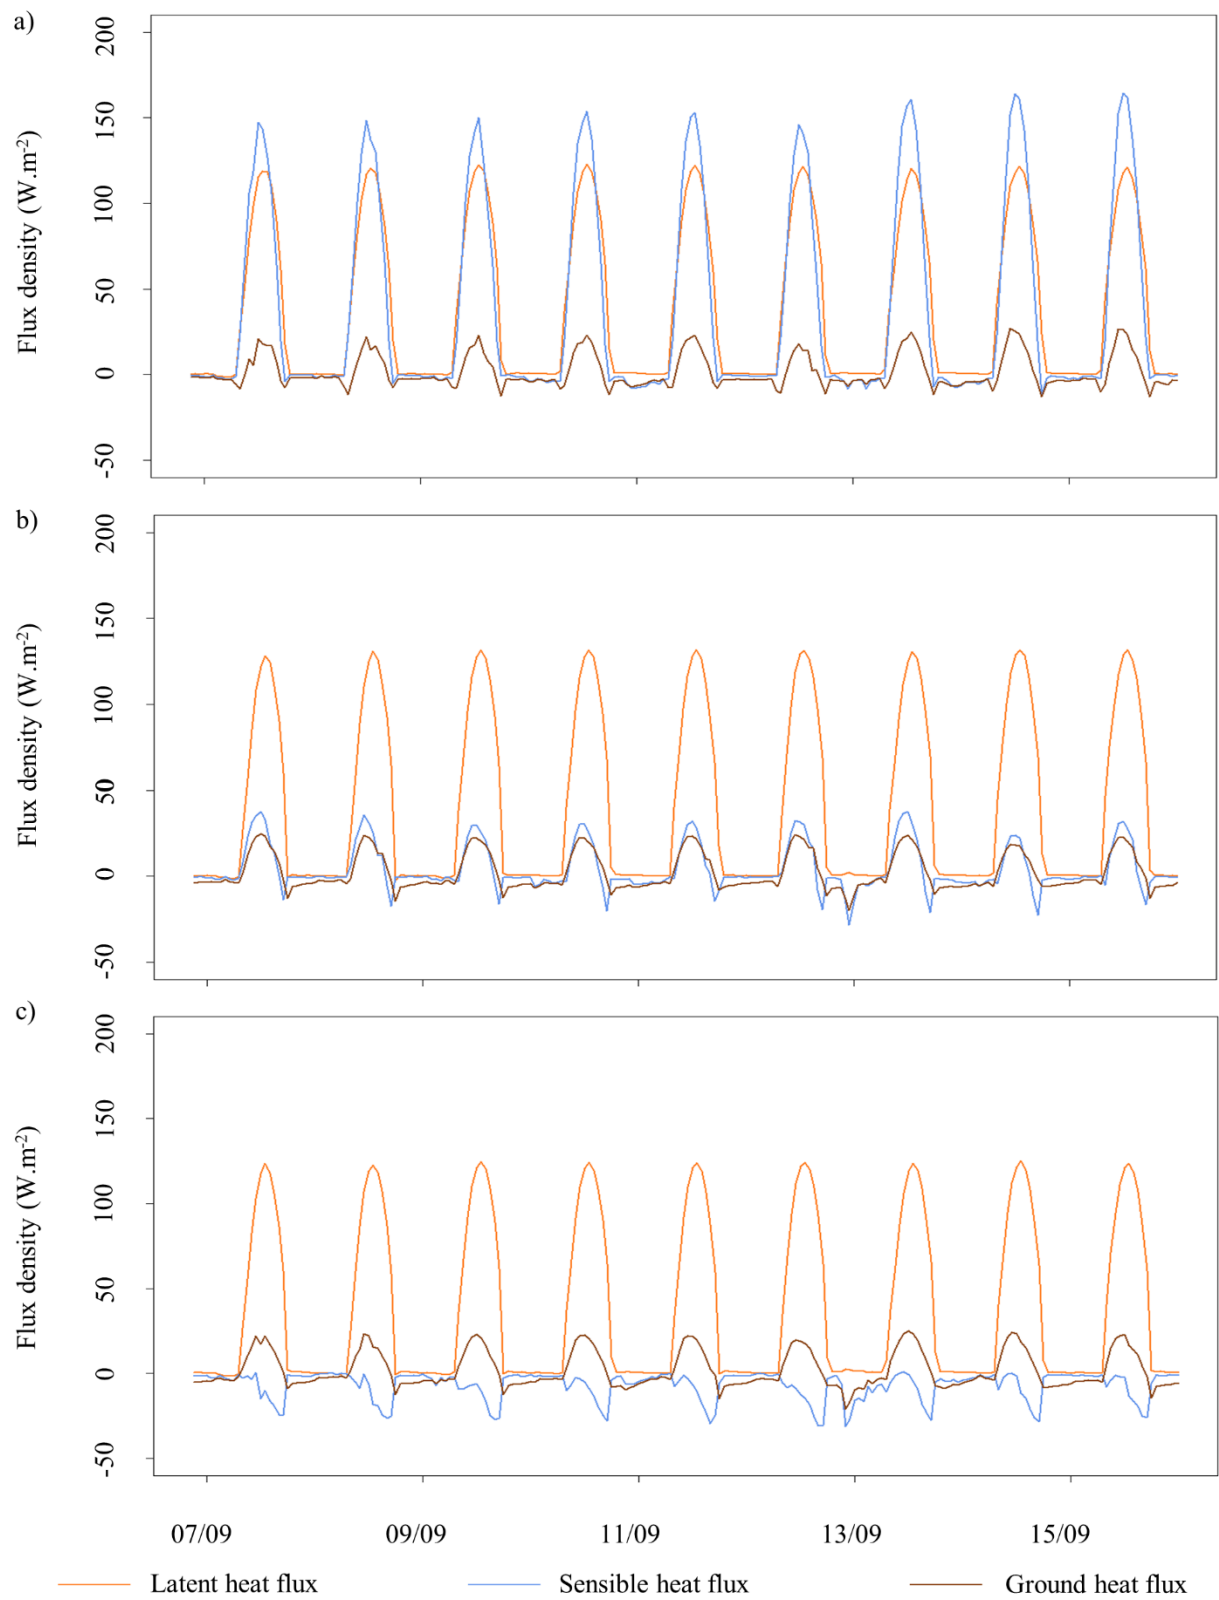

**Figure S3.** Diurnal difference (SB - SA) of simulated surface energy fluxes ( $\text{W.m}^{-2}$ ) at a) UP 2, b) UP3, and c) UP5.

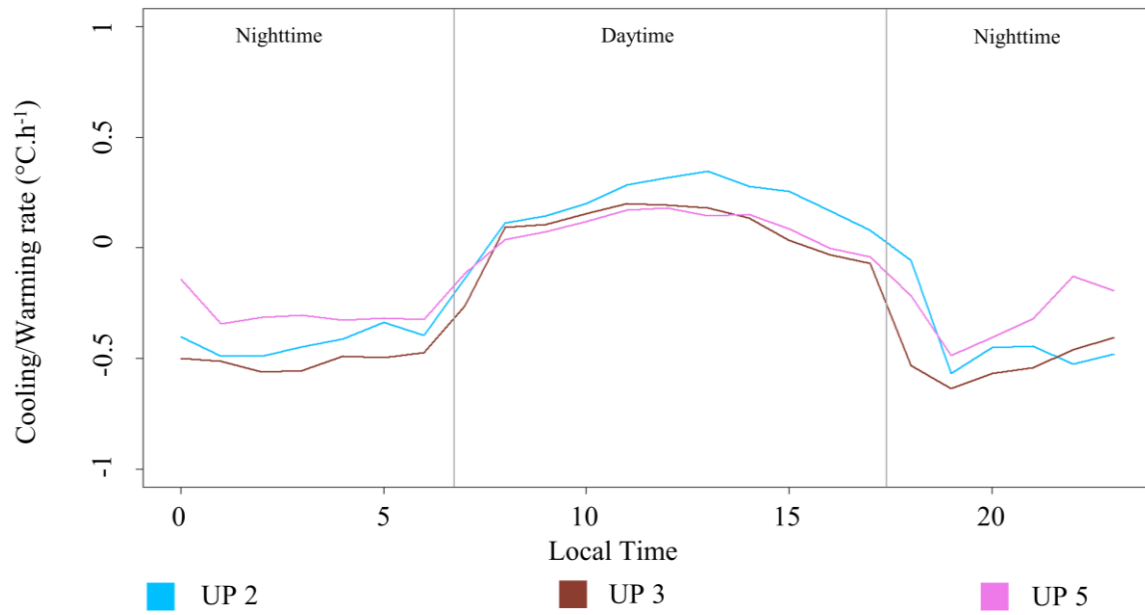

**Figure S4.** Diurnal cooling/warming rates ( $^{\circ}\text{C.h}^{-1}$ ) calculated from the SA and SB simulations. compared to rates calculated from hourly air temperature observations at UP2, UP3, and UP5.

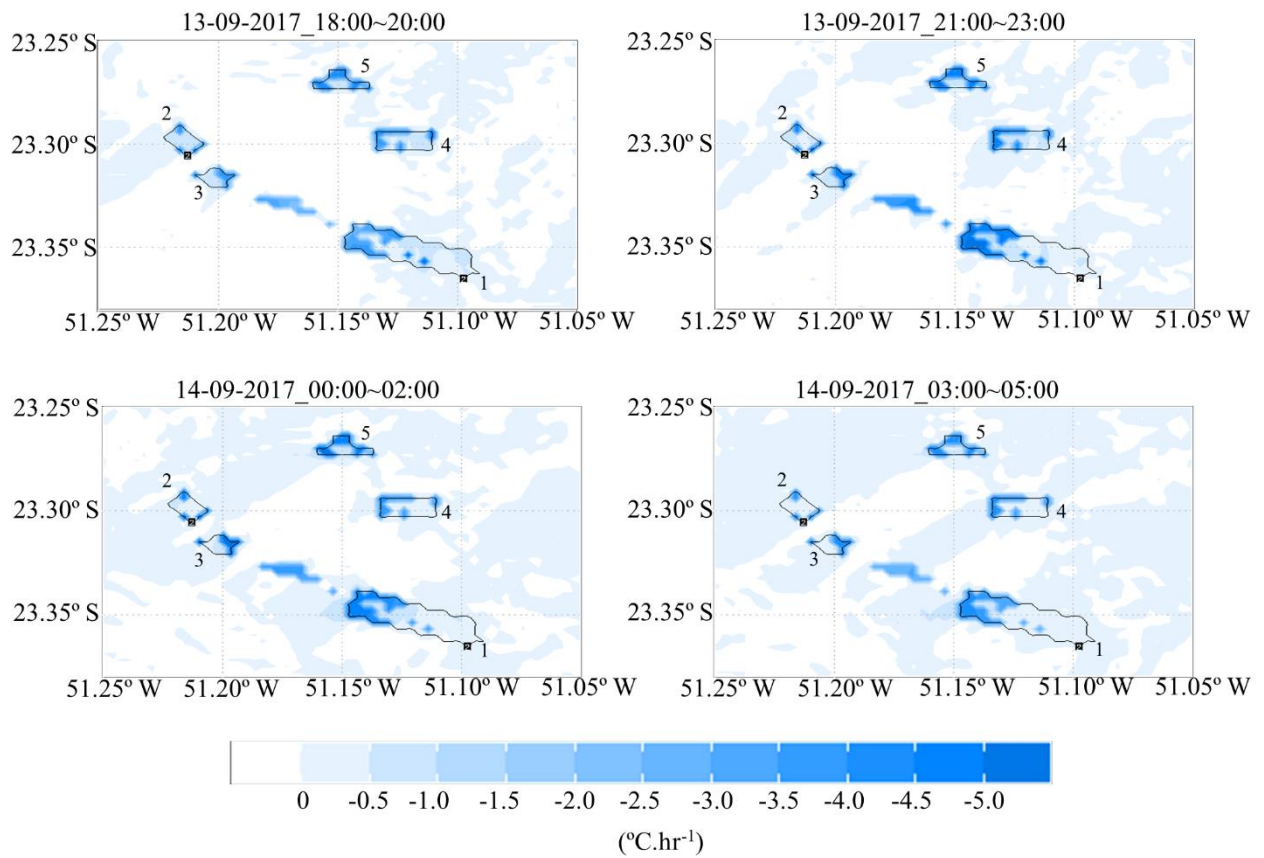

**Figure S5.** Mean spatial differences (SB - SA) of T2 temperatures ( $^{\circ}\text{C.h}^{-1}$ ) during nighttime (September 13th to 14th). Note: Park's delimitation in black outline).

**Table S1.** Characteristics of LCZ urban classes

| Class | Mean height (m) | Street width (m) | Mean building width (m) |
|-------|-----------------|------------------|-------------------------|
| 31    | 37.5            | 6.0              | 25.0                    |
| 32    | 17.5            | 6.0              | 17.5                    |
| 33    | 7.5             | 6.0              | 6.5                     |
| 34    | 37.5            | 6.0              | 25.0                    |
| 35    | 17.5            | 6.0              | 17.5                    |
| 36    | 7.5             | 6.0              | 6.5                     |
| 37    | 7.5             | 5.3              | 10.0                    |
| 38    | 7.5             | 12.5             | 35.0                    |
| 39    | 7.5             | 5.3              | 6.5                     |
| 40    | 3.3             | 12.5             | 225.0                   |

**Table S2.** Dimensions of urban GIs (Lake and Parks)

| Urban Parks  | Centroid (°) |           | Area (km <sup>2</sup> ) | Grid points |
|--------------|--------------|-----------|-------------------------|-------------|
|              | Latitude     | Longitude |                         |             |
| 1            | -23.35       | -51.13    | 8.00                    | 72          |
| 2            | -23.30       | -51.22    | 2.00                    | 18          |
| 3            | -23.32       | -51.20    | 1.56                    | 14          |
| 4            | -23.30       | -51.13    | 4.00                    | 36          |
| 5            | -23.27       | -51.15    | 2.78                    | 25          |
| Lake         | -23.33       | -51.16    | 1.77                    | 16          |
| <b>Total</b> |              |           | 20.11                   | 181         |

**Table S3.** Accuracy Matrix for MAL WUDAPT Level “0”, with known (vertical axis) vs. predicted (horizontal axis) test-class frequencies.

[illegible]

**Table S4.** Statistical performance of simulations for meteorological variables at domain d03.

| Variable                    | Station | Simulation | Mean <sub>obs</sub> | Mean <sub>sim</sub> | $\sigma_{obs}$ | $\sigma_{sim}$ | r    | BIAS  | RMSE | S <sub>Spielke</sub> |
|-----------------------------|---------|------------|---------------------|---------------------|----------------|----------------|------|-------|------|----------------------|
| T2 (°C)                     | IAT     | DEFAULT    | 26.99               | 27.59               | 4.75           | 4.08           | 0.97 | 0.59  | 1.47 | 0.66                 |
|                             |         | WUDAPT     |                     | 27.11               |                | 3.76           | 0.96 | 0.11  | 1.55 | 0.92                 |
|                             | SIMEPAR | DEFAULT    | 25.19               | 27.67               | 5.30           | 4.26           | 0.96 | 2.48  | 3.00 | 0.89                 |
|                             |         | WUDAPT     |                     | 27.07               |                | 3.88           | 0.96 | 1.88  | 2.71 | 1.00                 |
| Q2<br>(g.kg <sup>-1</sup> ) | IAT     | DEFAULT    | 6.49                | 6.86                | 0.71           | 1.33           | 0.51 | 0.37  | 1.16 | 3.21                 |
|                             |         | WUDAPT     |                     | 6.85                |                | 1.29           | 0.51 | 0.36  | 1.20 | 3.09                 |
|                             | SIMEPAR | DEFAULT    | 6.94                | 6.68                | 0.65           | 1.36           | 0.43 | -0.25 | 1.20 | 4.15                 |
|                             |         | WUDAPT     |                     | 6.87                |                | 1.33           | 0.43 | -0.01 | 1.26 | 3.86                 |
| WS10 (m.s <sup>-1</sup> )   | IAT     | DEFAULT    | 0.65                | 2.43                | 0.40           | 1.15           | 0.51 | 1.78  | 2.04 | 7.26                 |
|                             |         | WUDAPT     |                     | 1.12                |                | 0.52           | 0.39 | 0.47  | 0.69 | 2.49                 |
|                             | SIMEPAR | DEFAULT    | 2.15                | 2.45                | 1.01           | 1.23           | 0.58 | 0.29  | 1.08 | 1.94                 |
|                             |         | WUDAPT     |                     | 1.25                |                | 0.60           | 0.48 | -0.91 | 1.27 | 5.31                 |
